# Supplementary material for: The Influence of Age and Gender on Skin-Associated Microbial Communities in Urban and Rural Human Populations
Source: PubMed Central journal article supplement (PMC4624872; doi:10.1371/journal.pone.0141842), 2015-10-28

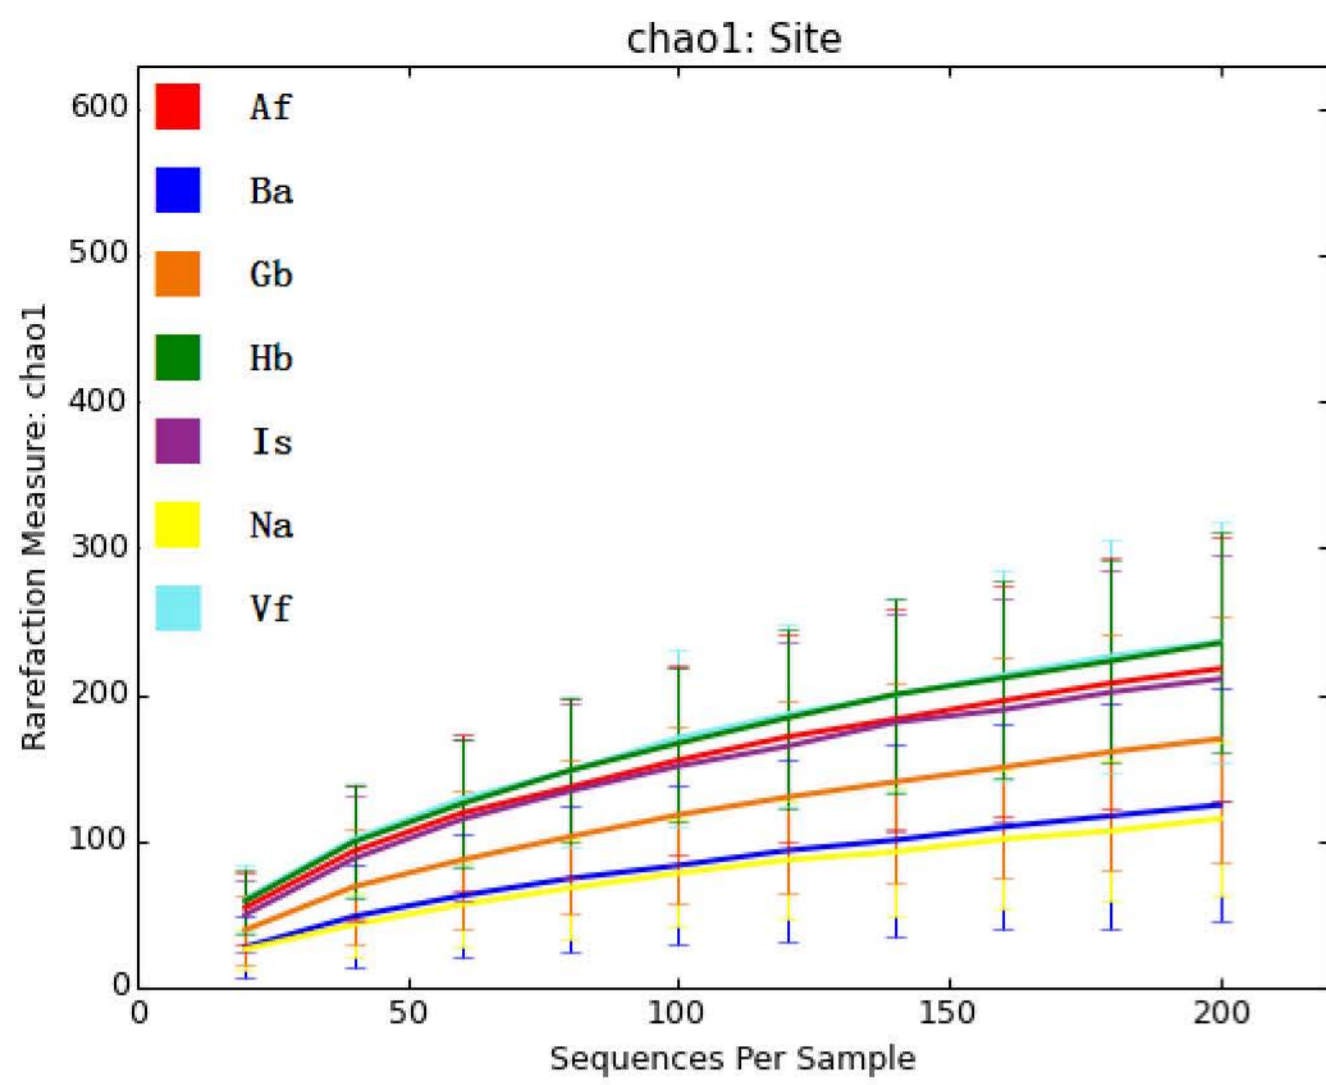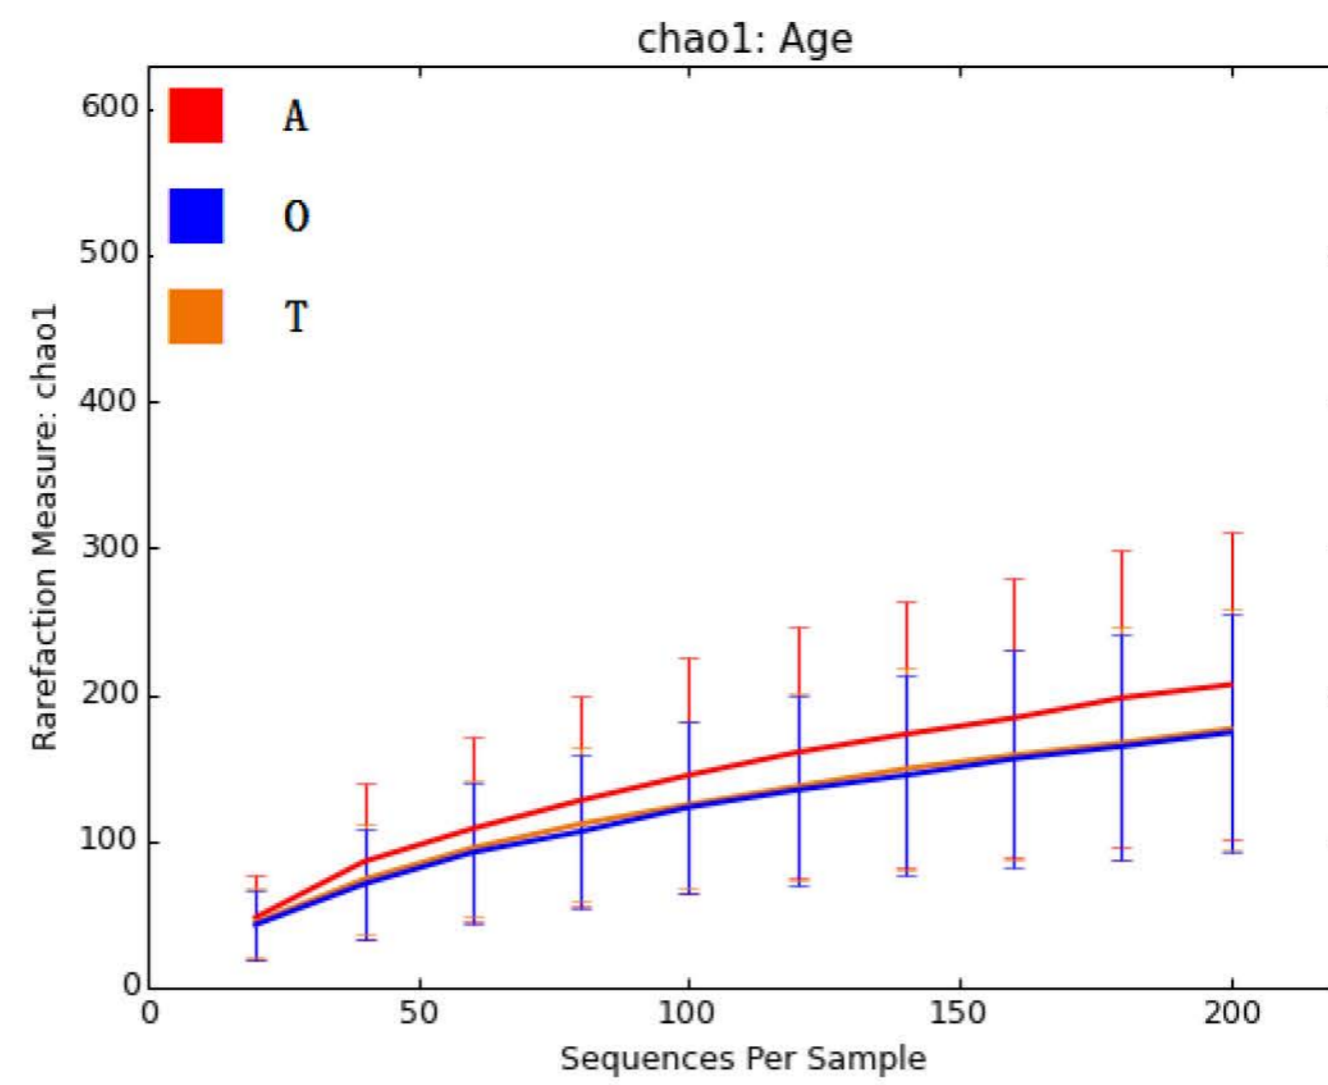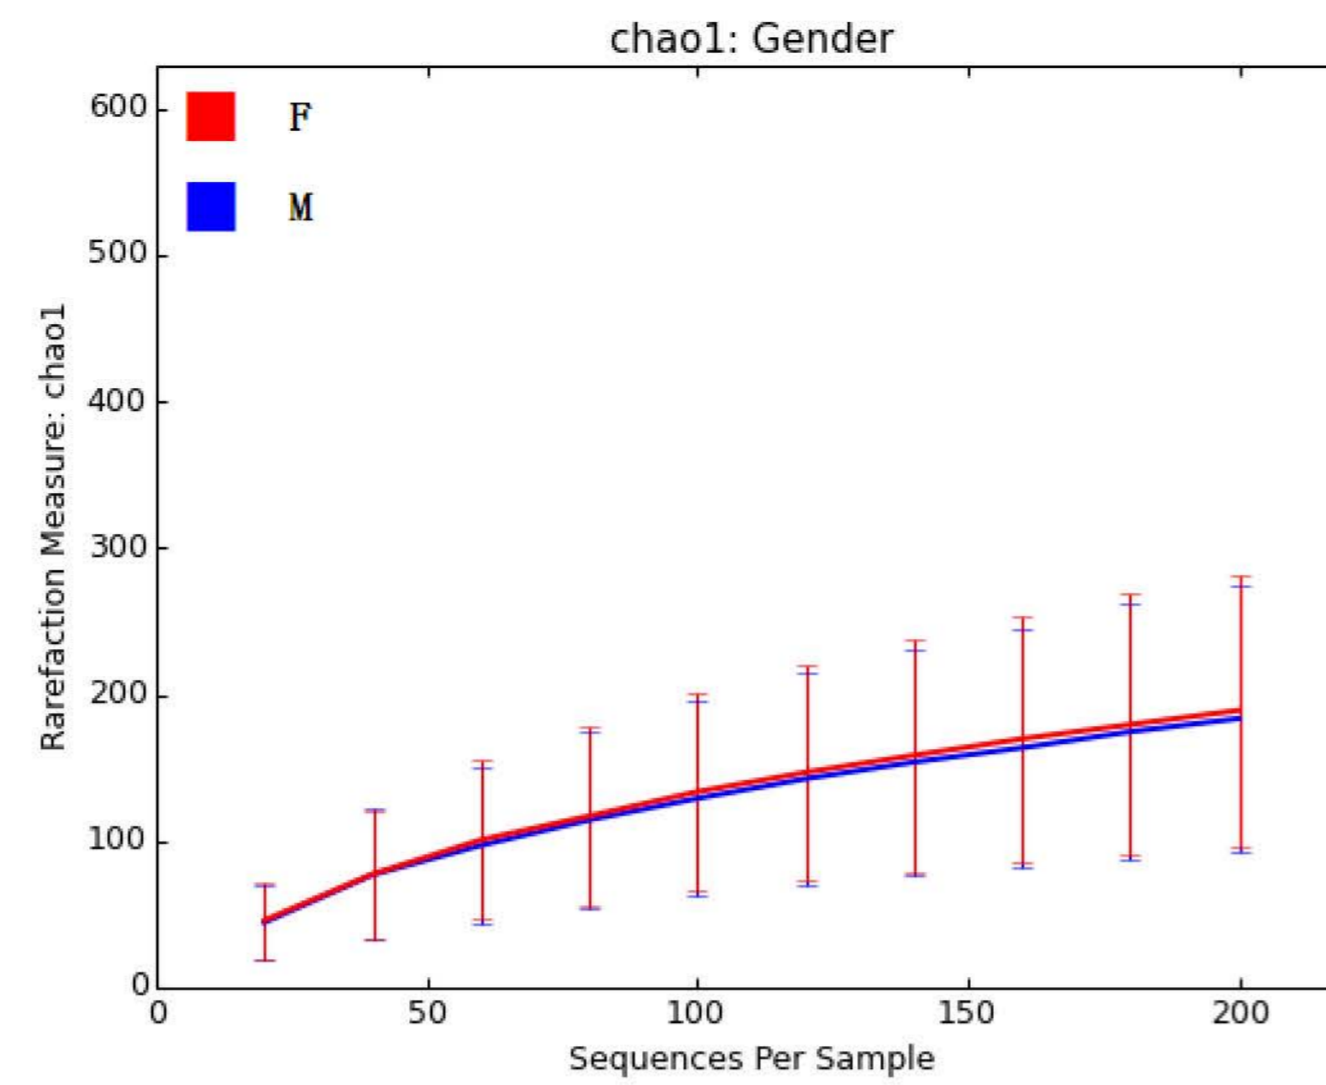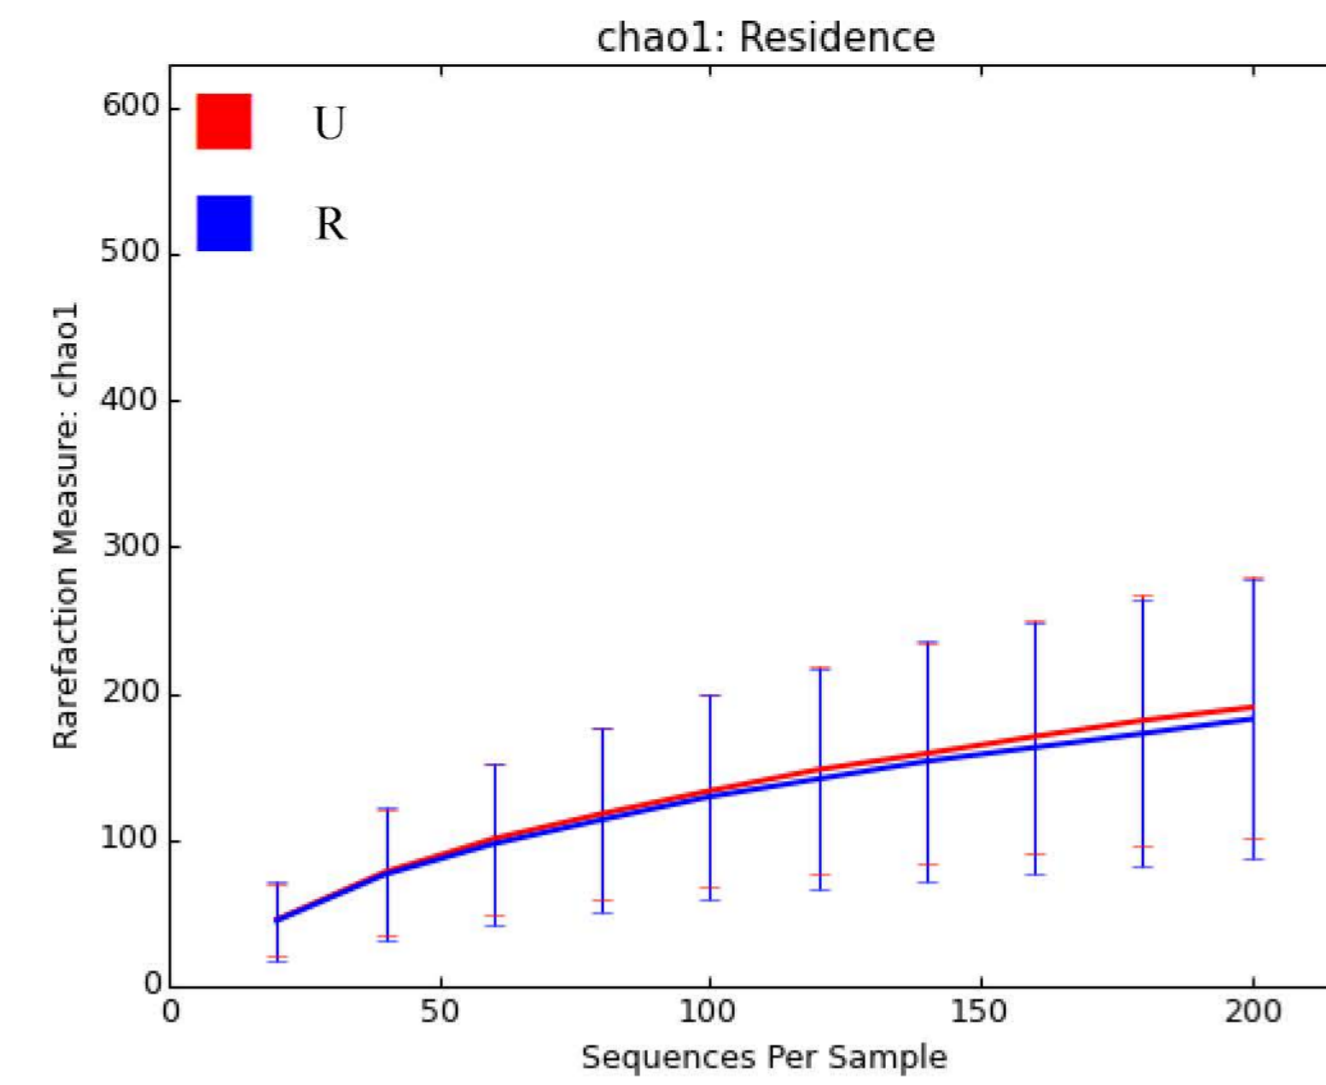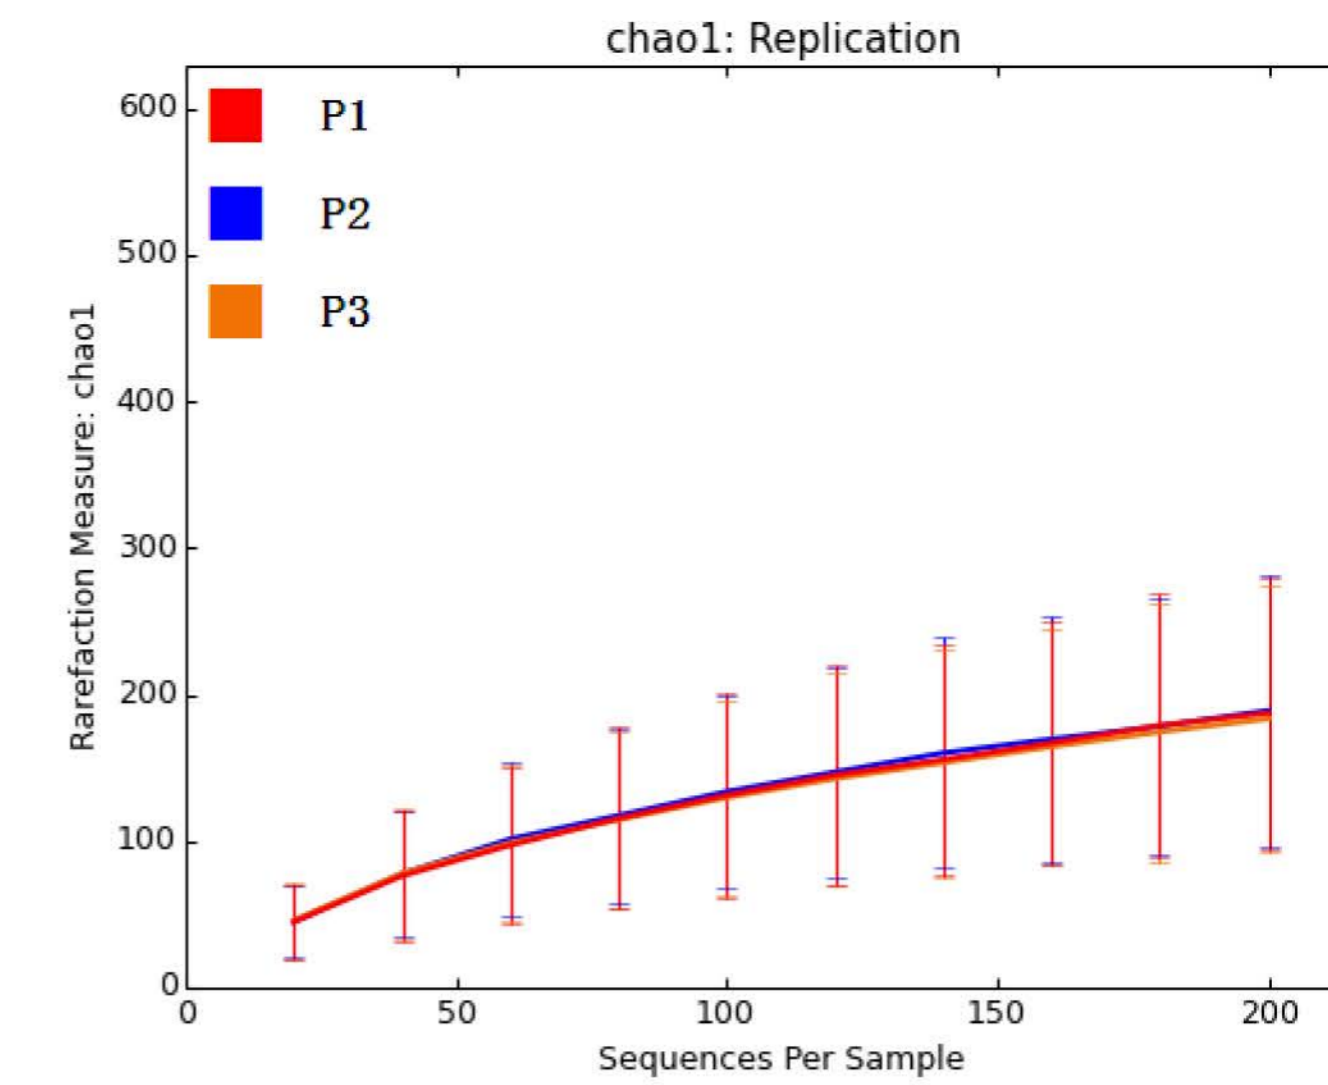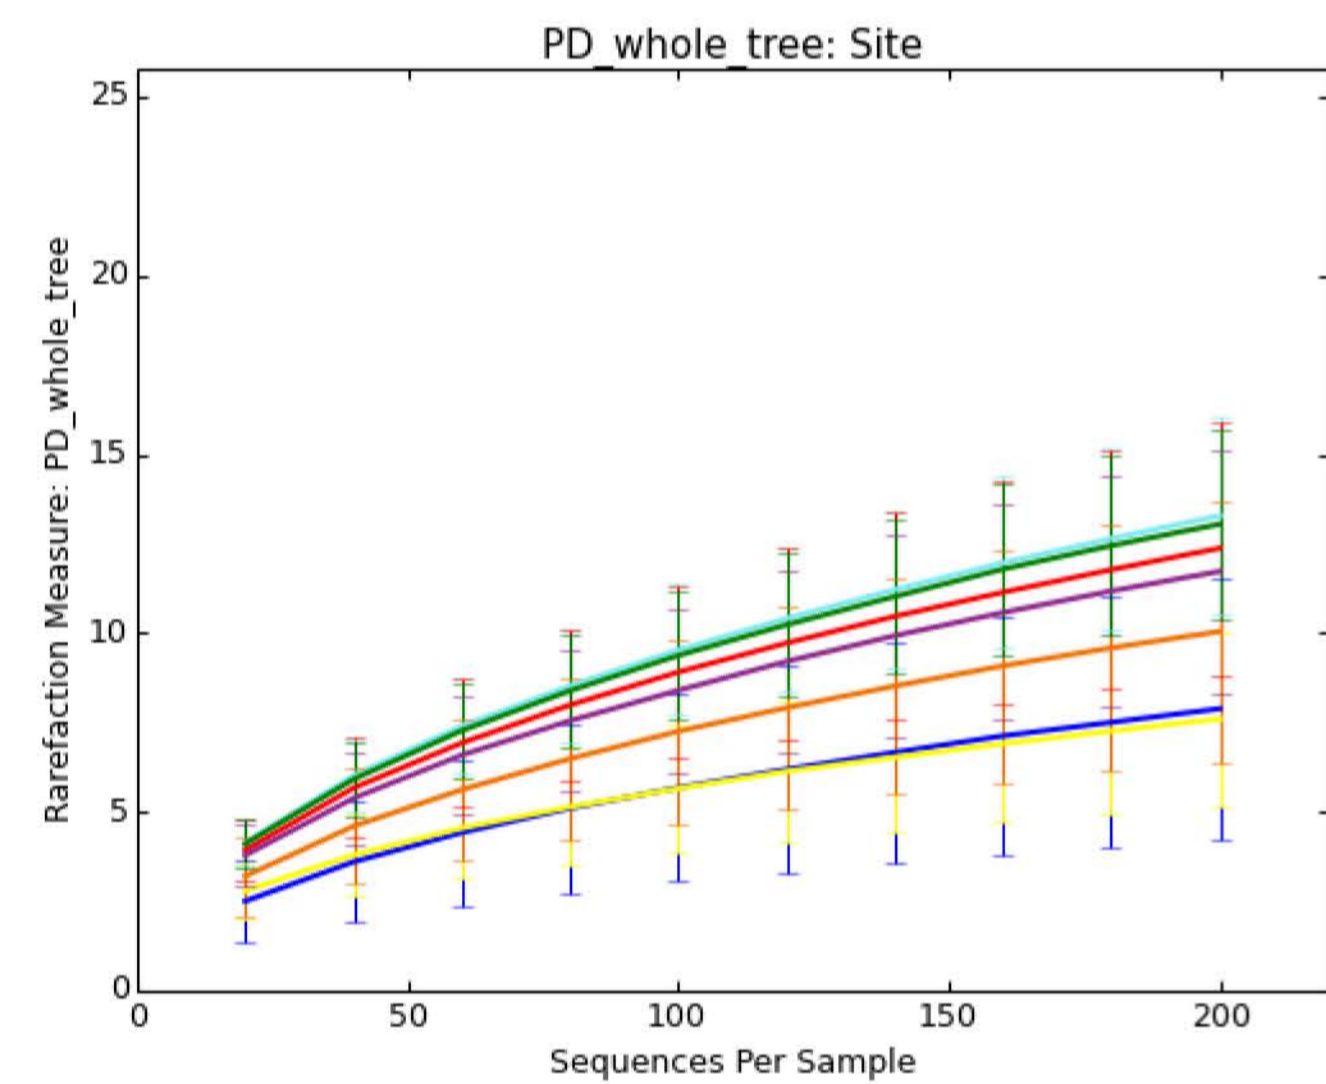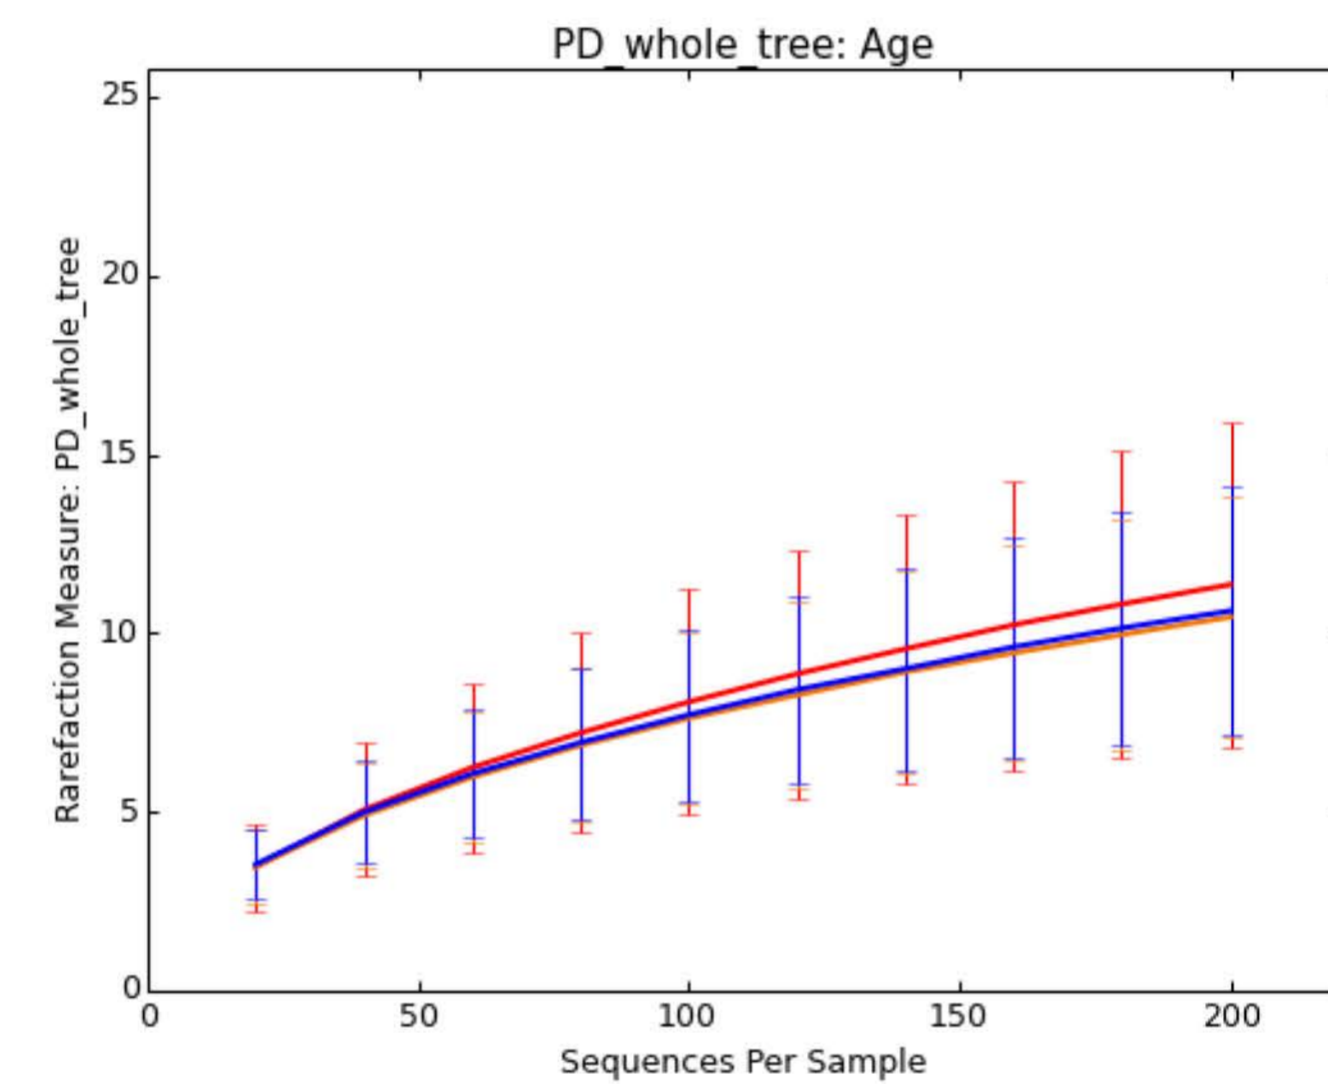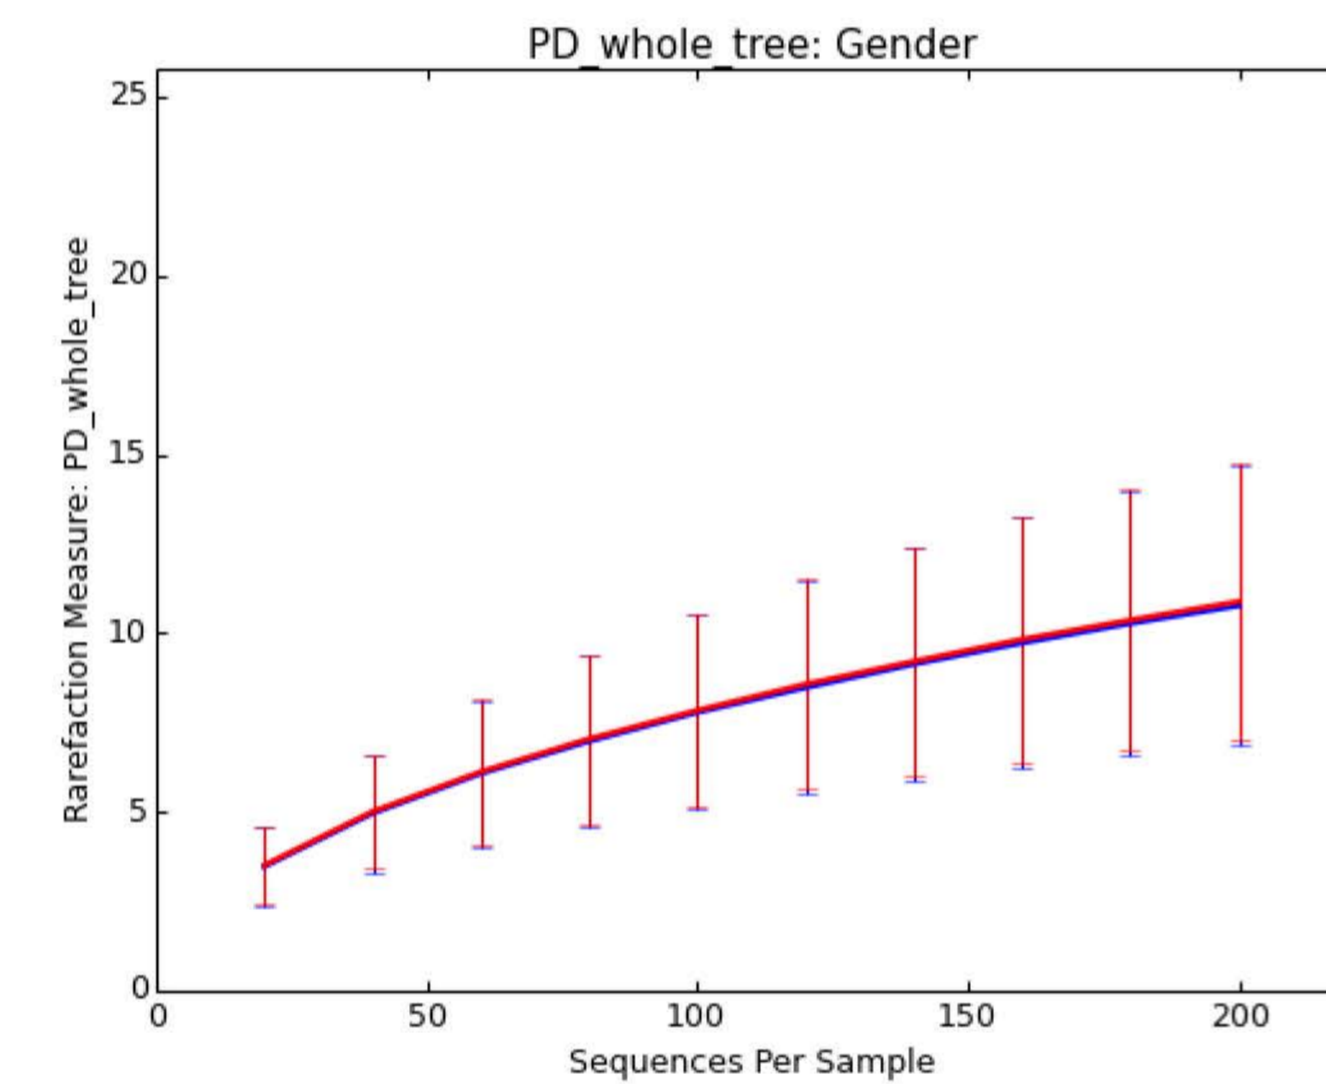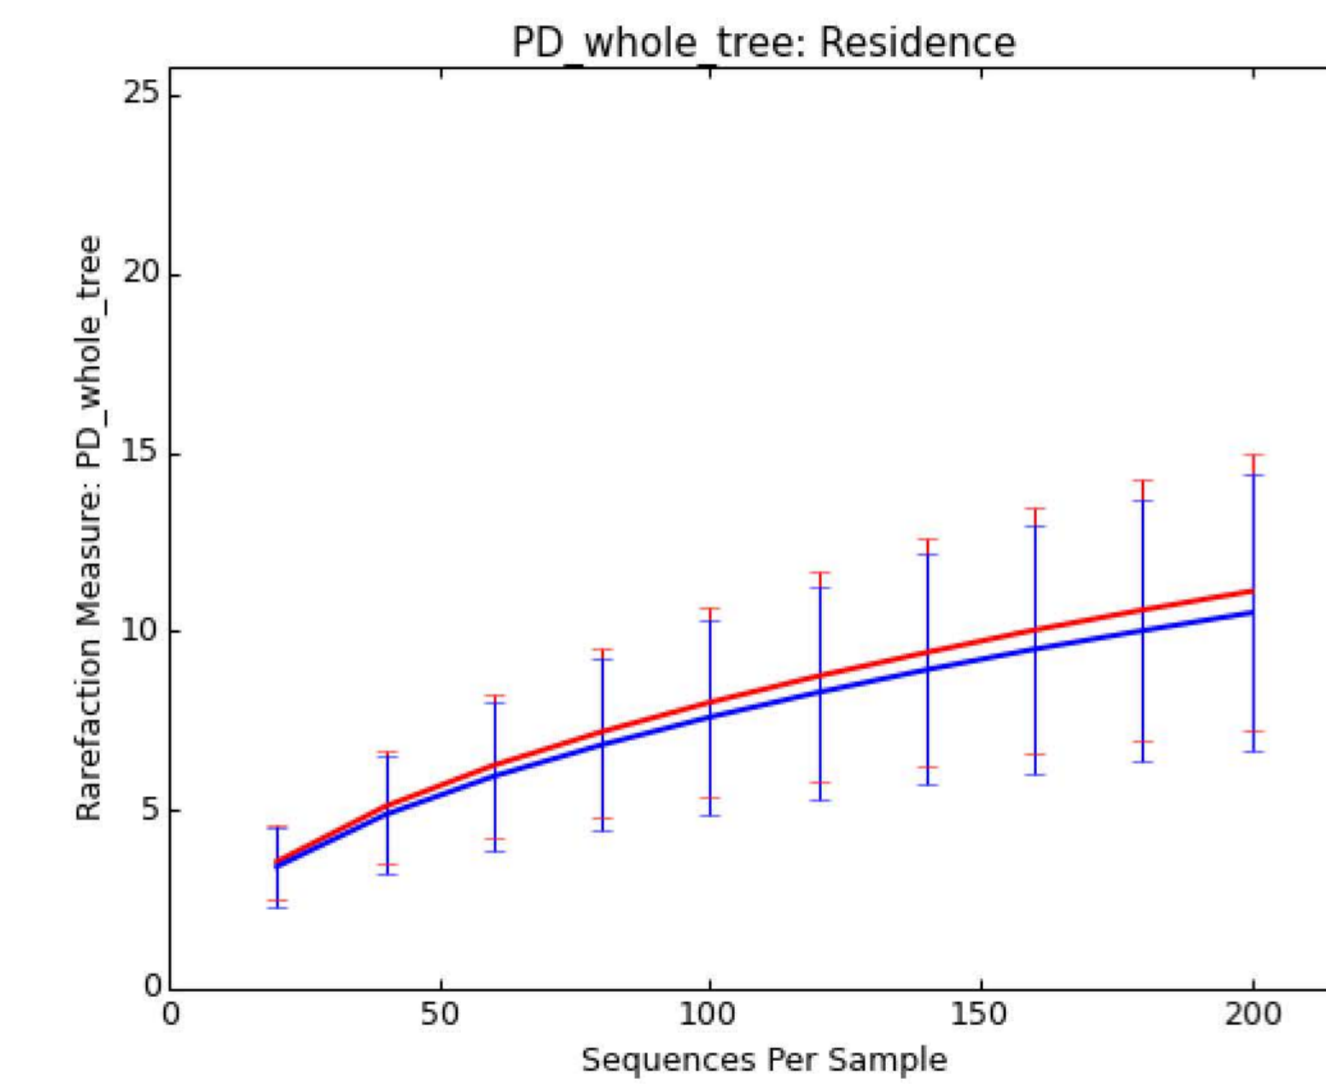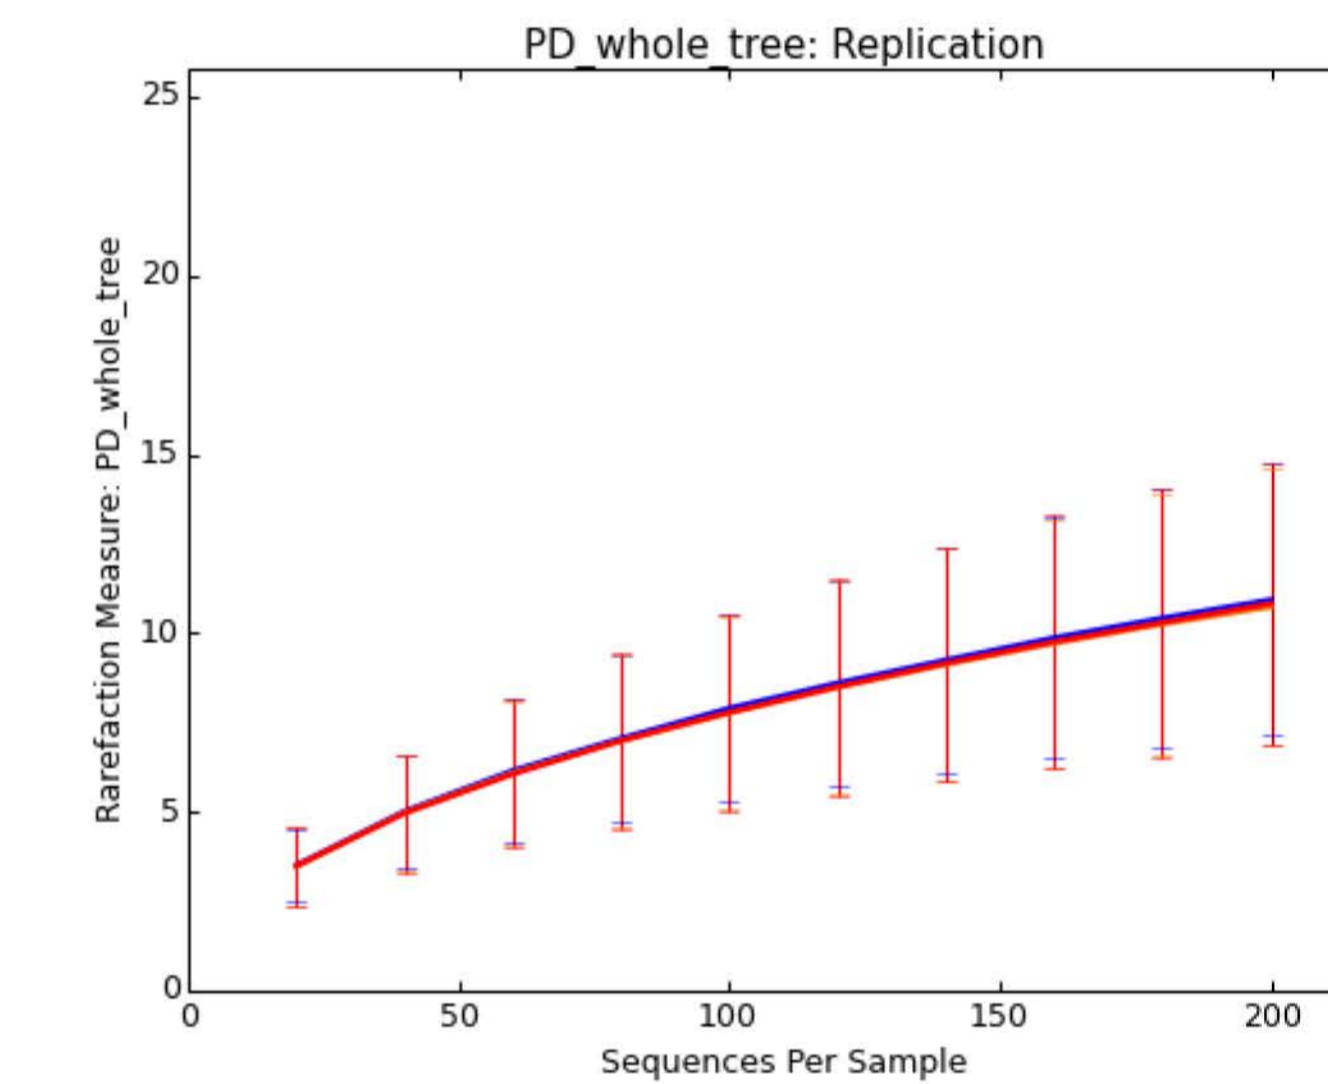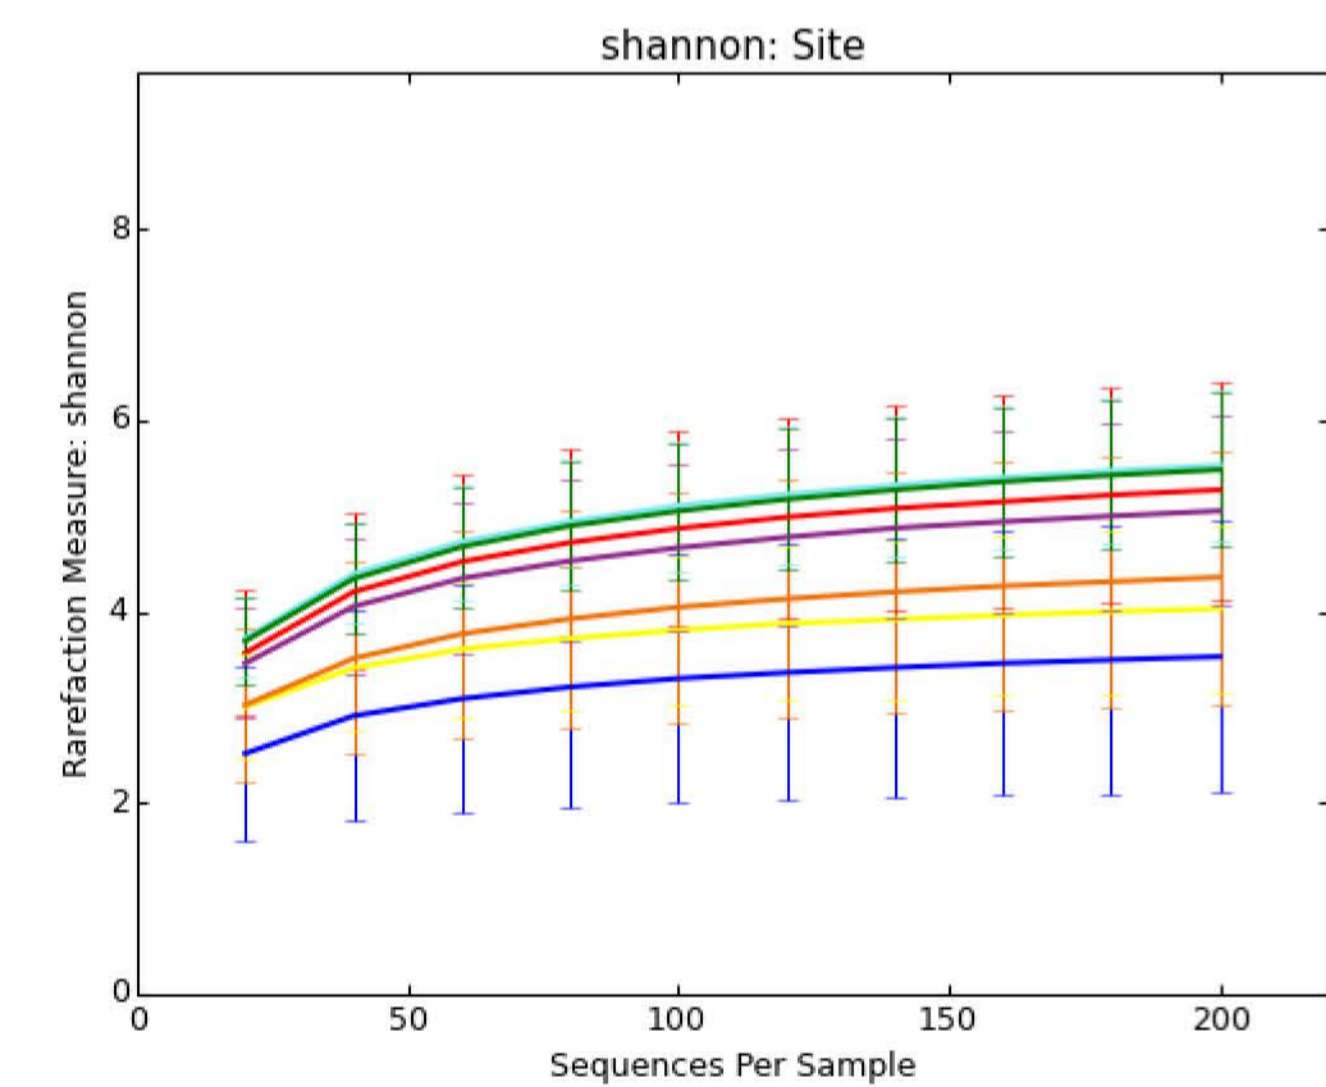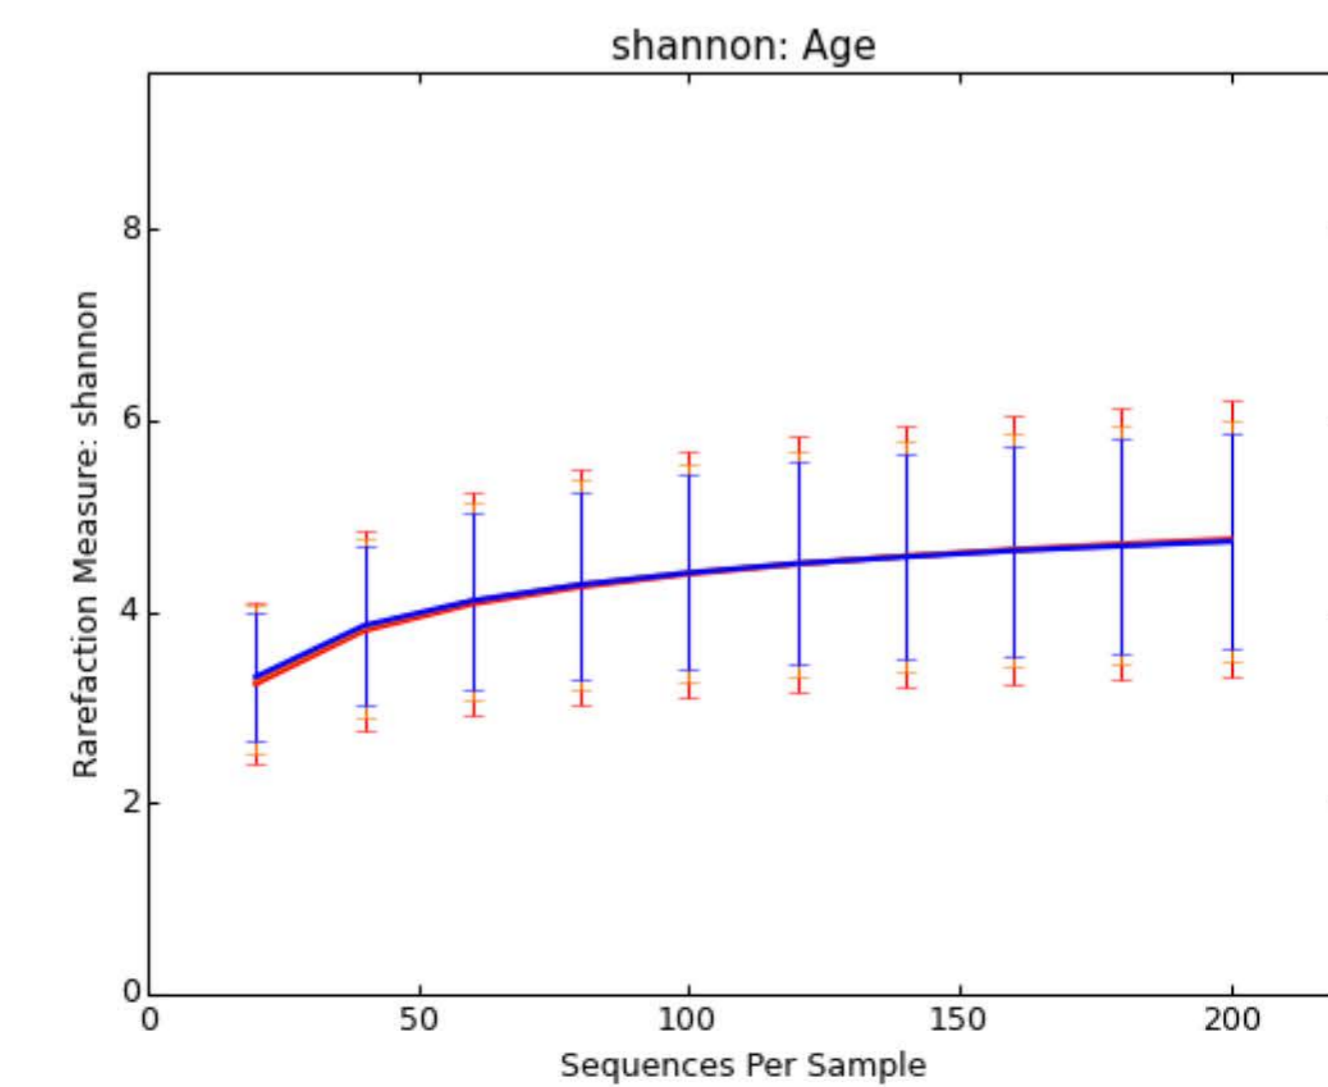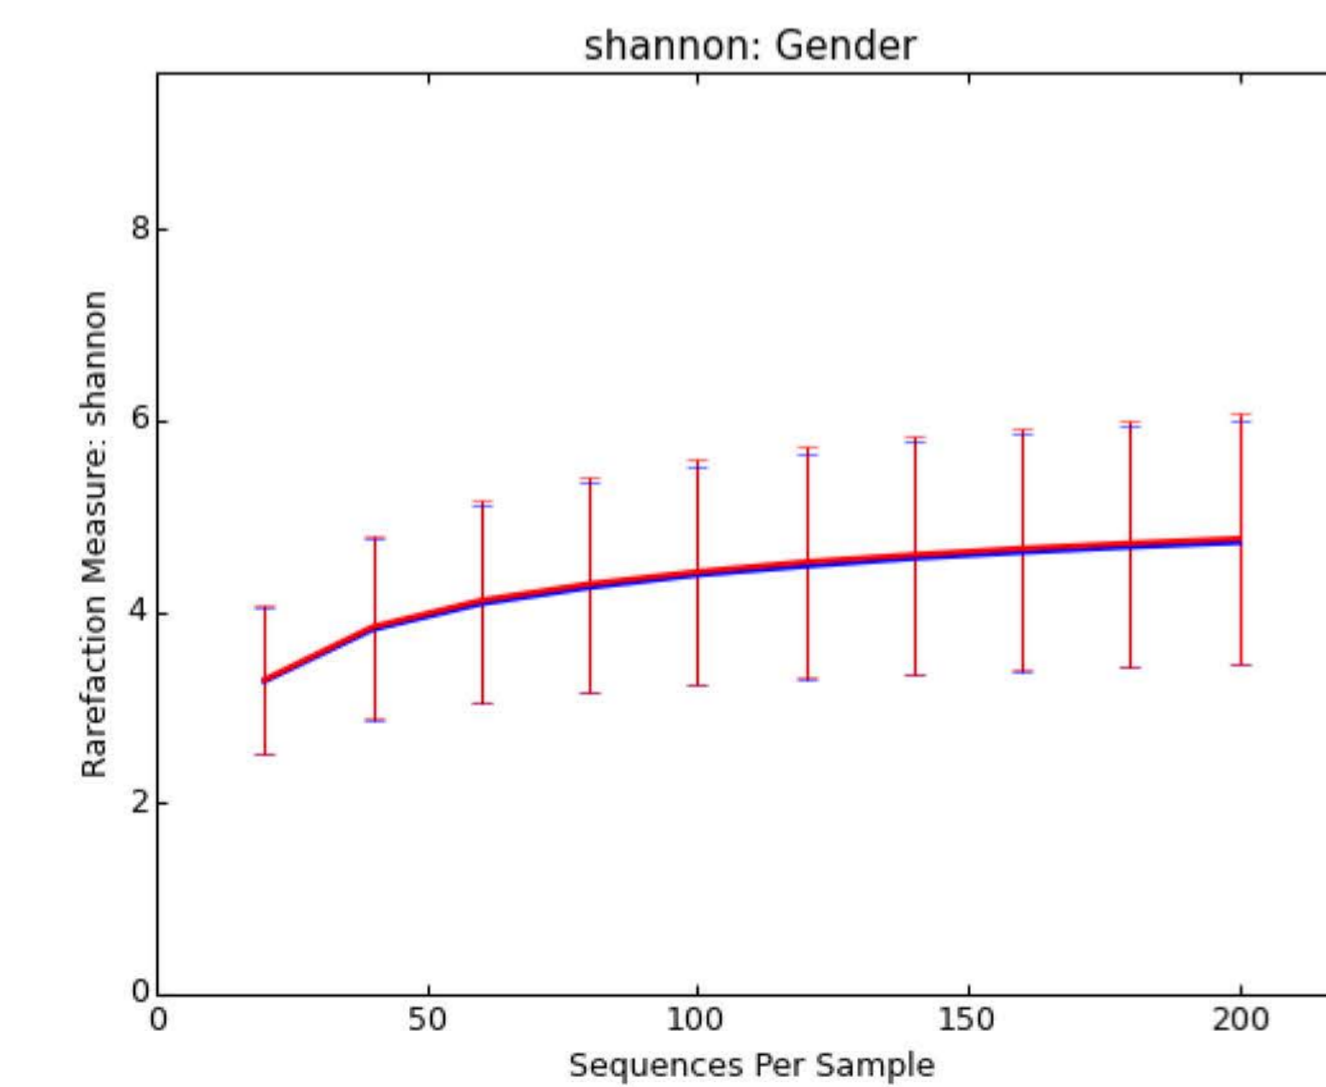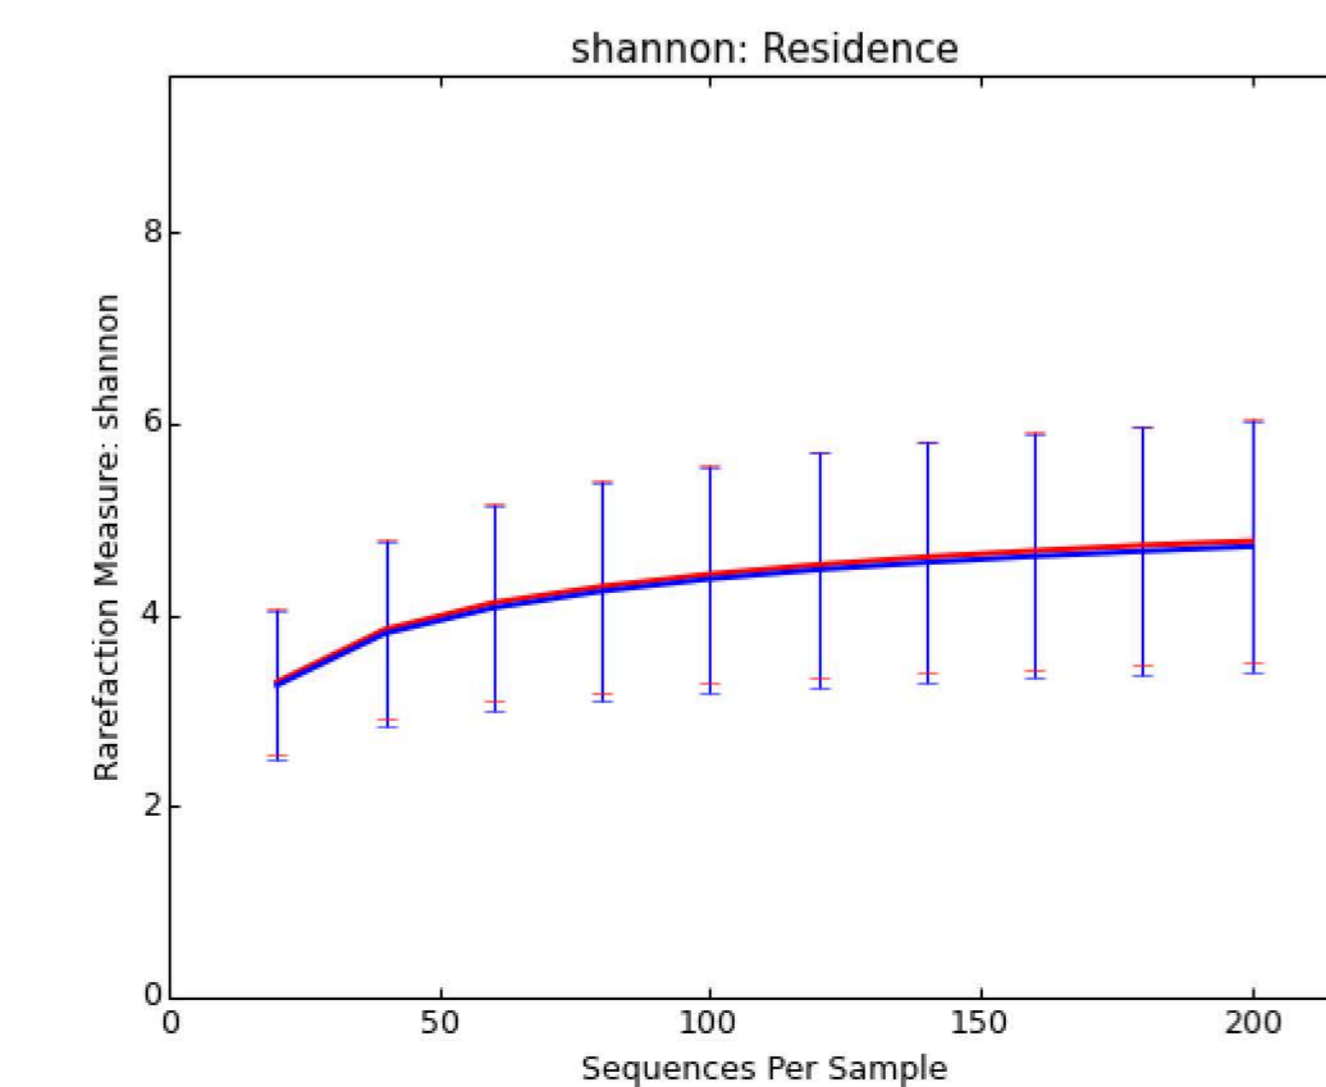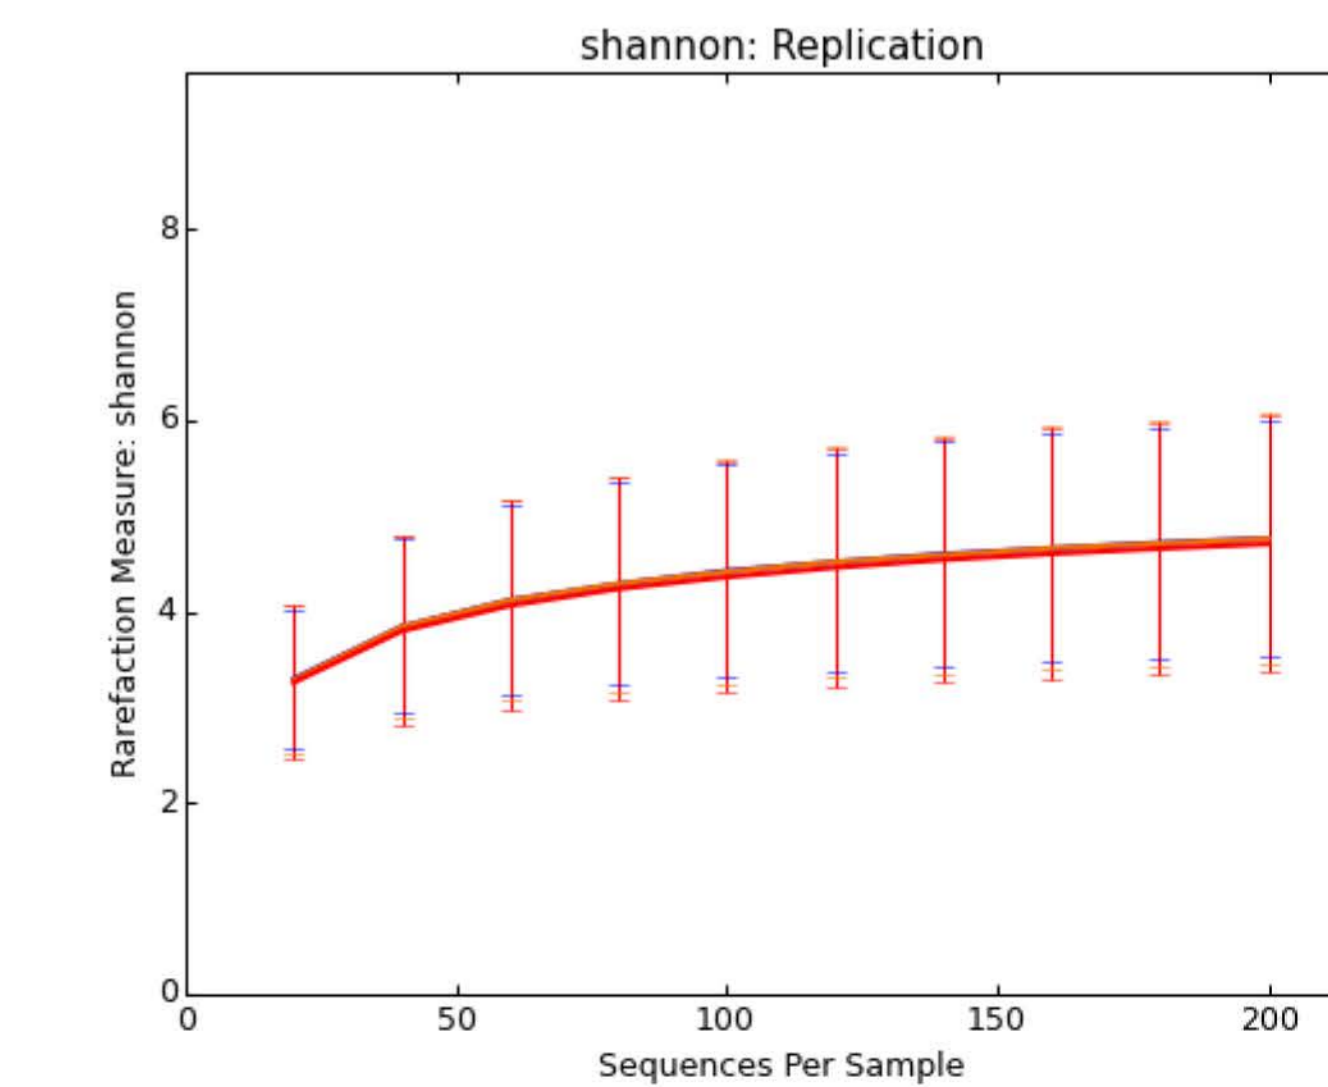

Supplement: pone.0141842.s003.pdf [file pone.0141842.s003.pdf]
